# Supplementary material for: Evaluation of the Toxicity of 5-Aryl-2-Aminoimidazole-Based Biofilm Inhibitors against Eukaryotic Cell Lines, Bone Cells and the Nematode Caenorhabditis elegans
Source: Molecules. 2014 Oct 16;19(10):16707–23. doi: 10.3390/molecules191016707 (PMC6271933; doi:10.3390/molecules191016707)
Supplement: Supplementary File 1 [file molecules-19-16707-s001.pdf]

# Supplementary Materials

**Table S1.** Cytostatic activity of 5-Ar-2AI subclasses against tumor cell lines, toxicity against *C. elegans* and anti-biofilm activity against bacterial strains.

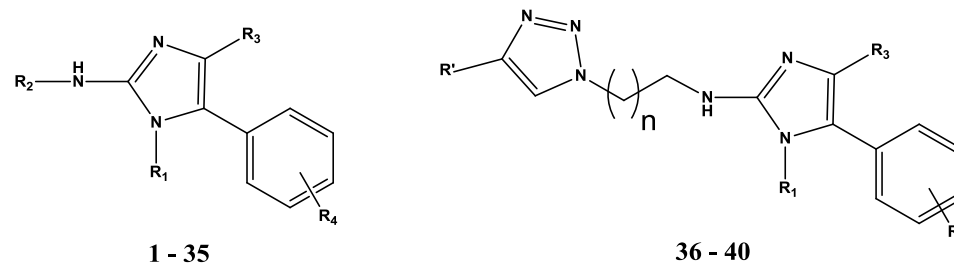

| n°              | R4                | R1             | R2 | R3 | IC <sub>50</sub> <sup>a</sup> (μM) |       |       | SD for IC <sub>50</sub> (μM) |      |      | BIC <sub>50</sub> <sup>b</sup> (μM) |                      | 95% Confidence Interval for BIC <sub>50</sub> |                      | <i>C.elegans</i>                    |                               |
|-----------------|-------------------|----------------|----|----|------------------------------------|-------|-------|------------------------------|------|------|-------------------------------------|----------------------|-----------------------------------------------|----------------------|-------------------------------------|-------------------------------|
|                 |                   |                |    |    | L1210                              | CEM   | HeLa  | L1210                        | CEM  | HeLa | <i>S.Typhimurium</i>                | <i>P. aeruginosa</i> | <i>S. Typhimurium</i>                         | <i>P. aeruginosa</i> | % Survival at<br>25 μM <sup>d</sup> | SD for % Survival at<br>25 μM |
| monosubstituted |                   |                |    |    |                                    |       |       |                              |      |      |                                     |                      |                                               |                      |                                     |                               |
| 1               | H                 | H              | H  | H  | 62.9                               | 94.3  | 144.6 | 31.4                         | 75.4 | 31.4 | 130.2                               | 72.6                 | 112.6–150.7                                   | 38.7–136.2           | 89.8                                | 8.2                           |
| 2               | 4-Cl              | H              | H  | H  | 77.5                               | 49.6  | 72.3  | 25.8                         | 8.3  | 5.2  | 16                                  | 3.5                  | 14.3–17.9                                     | 2.3–5.2              | 84.9                                | 6.0                           |
| 3               | 4-Ph              | H              | H  | H  | 37.4                               | 13.6  | 34.0  | 25.9                         | 4.3  | 1.3  | 17.3                                | 8.6                  | 15.9–18.8                                     | 4.8–15.6             | nd                                  |                               |
| 4               | 4-NO <sub>2</sub> | H              | H  | H  | 83.3                               | 63.7  | 107.7 | 4.9                          | 14.7 | 14.7 | 17.6                                | 34.5                 | 15.0–20.5                                     | 20.4–58.8            | 97.3                                | 7.3                           |
| 5               | 4-Br              | H              | H  | H  | 10.1                               | 13.9  | 21.8  | 2.5                          | 9.7  | 1.7  | 47.9                                | 3.2                  | 36.6–62.8                                     | 2.3–4.5              | 90.6                                | 10.8                          |
| N1-substituted  |                   |                |    |    |                                    |       |       |                              |      |      |                                     |                      |                                               |                      |                                     |                               |
| 6               | H                 | Oct            | H  | H  | 3.2                                | 467.9 | 3.0   | 1.1                          | 2.2  | 1.1  | 11.9                                | 18.5                 | 10.2–13.8                                     | 8.4–40.7             | 92.5                                | 19.8                          |
| 7               | 4-Cl              | Oct            | H  | H  | 3.9                                | 356.8 | 4.5   | 1.3                          | 0.7  | 1.0  | 5.9                                 | 4.0                  |                                               | 3.0–5.2              | 86.6                                | 14.2                          |
| 8               | 4-Cl              | Trd            | H  | H  | 7.2                                | 6.4   | 4.5   | 0.3                          | 1.9  | 3.5  | 19.5                                | 33.9                 | 11.1–34.5                                     | 15.0–76.4            | nd                                  |                               |
| 9               | 4-Ph              | Hept           | H  | H  | 7.5                                | 8.1   | 8.7   | 0.3                          | 1.2  | 1.2  | 9.3                                 | 25.2                 | 6.9–12.4                                      | 15.6–40.9            | nd                                  |                               |
| 10              | 4-Ph              | Oct            | H  | H  | 7.8                                | 8.3   | 6.6   | 1.2                          | 0.0  | 1.4  | 3.3                                 | 8.9                  | 1.2–9.0                                       | 3.5–22.5             | nd                                  |                               |
| 11              | 4-Ph              | c-Pen          | H  | H  | 4.3                                | 2.9   | 8.2   | 2.3                          | 1.4  | 1.0  | 7.5                                 | 353.1                | 5.5–10.3                                      | 151.2–824.6          | nd                                  |                               |
| 12              | 4-Ph              | c-Hept         | H  | H  | 8.1                                | 5.4   | 6.6   | 1.5                          | 4.2  | 3.9  | ~12.5                               | 6.6                  |                                               | 2.9–14.7             | nd                                  |                               |
| 13              | 4-Ph              | c-Oct          | H  | H  | 6.9                                | 4.9   | 6.9   | 6.8                          | 88.4 | 10.2 | ~22.9                               | 3.2                  |                                               | 1.5–6.7              | nd                                  |                               |
| 14              | 4-F               | Oct            | H  | H  | 3.5                                | 7.3   | 8.6   | 0.0                          | 2.4  | 1.0  | ~10.8                               | 4.9                  |                                               | 3.8–6.2              | nd                                  |                               |
| 15              | 4-SMe             | Oct            | H  | H  | 4.1                                | 7.2   | 6.3   | 1.6                          | 0.3  | 1.3  | 6.7                                 | 2.8                  | 6.0–7.5                                       | 1.9–4.0              | nd                                  |                               |
| 16              | 3-Br              | Oct            | H  | H  | 6.9                                | 9.7   | 8.0   | 0.0                          | 0.6  | 0.3  | 11.2                                | 40.6                 | 10.3–12.1                                     | 29.5–56.1            | nd                                  |                               |
| 17              | 3,4-diCl          | m-MeOPhenethyl | H  | H  | 6.9                                | 8.6   | 6.6   | 1.3                          | 0.1  | 0.6  | >400                                | nd <sup>c</sup>      |                                               |                      | nd                                  |                               |

Table S1. Cont.

| n°                      | R4       | R1  | R2                 | R3                   | IC <sub>50</sub> <sup>a</sup> (μM) |       |       | SD for IC <sub>50</sub> (μM) |       |       | BIC <sub>50</sub> <sup>b</sup> (μM) |               | 95% Confidence Interval for BIC <sub>50</sub> |               | C.elegans                        |                            |
|-------------------------|----------|-----|--------------------|----------------------|------------------------------------|-------|-------|------------------------------|-------|-------|-------------------------------------|---------------|-----------------------------------------------|---------------|----------------------------------|----------------------------|
|                         |          |     |                    |                      | L1210                              | CEM   | HeLa  | L1210                        | CEM   | HeLa  | S. Typhimurium                      | P. aeruginosa | S. Typhimurium                                | P. aeruginosa | % Survival at 25 μM <sup>d</sup> | SD for % Survival at 25 μM |
| 2N-substituted          |          |     |                    |                      |                                    |       |       |                              |       |       |                                     |               |                                               |               |                                  |                            |
| 18                      | H        | H   | Bu                 | H                    | 46.4                               | 667.4 | 19.5  | 0.0                          | 92.9  | 4.6   | 25.3                                | 31.8          | 23.3–27.6                                     | 21.3–47.3     | nd                               |                            |
| 19                      | H        | H   | i-Bu               | H                    | 83.6                               | 382.7 | 91.4  | 9.3                          | 9.3   | 27.9  | 4.9                                 | 1.2           | 3.5–6.7                                       | 0.6 2.5       | nd                               |                            |
| 20                      | H        | H   | c-Pen              | H                    | 27.3                               | 293.3 | 27.3  | 11.0                         | 10.1  | 3.5   | 52.9                                | 33.8          | 42.4–66.1                                     | 23.9–47.7     | 98.1                             | 2.7                        |
| 21                      | 4-Cl     | H   | Bu                 | H                    | 40.0                               | 374.6 | 34.7  | 12.0                         | 11.2  | 2.0   | nd                                  | nd            |                                               |               | nd                               |                            |
| 22                      | 4-Cl     | H   | i-Bu               | H                    | 336.3                              | 297.3 | 171.5 | 92.1                         | 0.0   | 104.1 | 2                                   | 0.9           | 1.6–2.5                                       | 0.5–1.8       | 97.6                             | 5.0                        |
| 23                      | 4-Cl     | H   | Pen                | H                    | 22.0                               | 322.9 | 19.8  | 14.0                         | 4.2   | 0.8   | >400                                | ~6.3          |                                               |               | nd                               |                            |
| 24                      | 4-Cl     | H   | c-Pen              | H                    | 35.5                               | 591.0 | 28.8  | 3.4                          | 11.5  | 22.9  | 4.4                                 | 13.5          | 4.0–4.8                                       | 9.0–20.5      | 100.1                            | 10.0                       |
| 25                      | 4-Br     | H   | Bu                 | H                    | 125.8                              | 493.0 | 50.7  | 6.0                          | 10.0  | 5.2   | 7.1                                 | 9.8           | 3.7–13.9                                      | 6.8–14.1      | 102.4                            | 5.7                        |
| 26                      | 4-Br     | H   | i-Bu               | H                    | 31.7                               | 306.0 | 22.6  | 2.8                          | 20.1  | 1.6   | 2.9                                 | 1.2           | 2.6–3.4                                       | 0.6–2.3       | nd                               |                            |
| 27                      | 4-Br     | H   | Pen                | H                    | 14.9                               | 375.2 | 16.3  | 10.4                         | 14.0  | 1.6   | 3.1                                 | 10.2          | 2.0–5.0                                       | 2.9–35.9      | nd                               |                            |
| 28                      | 4-Br     | H   | c-Pen              | H                    | 32.7                               | 673.6 | 32.7  | 3.3                          | 26.1  | 6.5   | 12.1                                | 7.2           | 6.5–22.5                                      | 4.4–12.0      | nd                               |                            |
| 29                      | 3,4-diCl | H   | c-Pen              | H                    | 76.1                               | 155.9 | 79.8  | 14.5                         | 101.5 | 54.4  | 5.7                                 | 7.9           | 3.8–8.5                                       | 4.2–14.8      | nd                               |                            |
| 4,5-disubstituted       |          |     |                    |                      |                                    |       |       |                              |       |       |                                     |               |                                               |               |                                  |                            |
| 30                      | H        | H   | H                  | 4-OMePh              | 64.1                               | 52.8  | 45.2  | 3.8                          | 3.8   | 15.1  | 77.1                                | nd            | 60.6–98.0                                     |               | nd                               |                            |
| 31                      | H        | H   | H                  | 4-ClPh               | 59.3                               | 48.2  | 40.8  | 7.4                          | 0.0   | 7.4   | 46.9                                | nd            | 35.2 62.5                                     |               | nd                               |                            |
| 32                      | 4-Cl     | H   | H                  | 4-MePh               | 12.3                               | 10.2  | 9.5   | 2.1                          | 1.4   | 1.8   | 12.9                                | nd            | 10.7–15.6                                     |               | nd                               |                            |
| 33                      | 4-Cl     | H   | H                  | 4-CF <sub>3</sub> Ph | 41.5                               | 35.5  | 26.1  | 3.0                          | 3.0   | 2.1   | 10.8                                | nd            | 6.5–17.8                                      |               | nd                               |                            |
| 34                      | 4-F      | H   | H                  | amidophenyl          | 74.2                               | 74.2  | 77.6  | 3.4                          | 23.6  | 6.7   | 182.1                               | nd            | 116.6–284.4                                   |               | nd                               |                            |
| 1,4,5-trisubstituted    |          |     |                    |                      |                                    |       |       |                              |       |       |                                     |               |                                               |               |                                  |                            |
| 35                      | 4-Me     | Ben | H                  | p-PenOBn             | 8.6                                | 8.4   | 14.8  | 0.7                          | 0.9   | 9.8   | 10.3                                | 27.4          | 8.0–13.3                                      | 12.32–60.78   | nd                               |                            |
| 2AI-triazole conjugates |          |     |                    |                      |                                    |       |       |                              |       |       |                                     |               |                                               |               |                                  |                            |
| 36                      | H        | H   | n = 2, R' = Ph     | H                    | 221.0                              | 452.6 | 72.9  | 115.0                        | 302.7 | 9.1   | 36.5                                | >400          | 22.9–58.1                                     |               | 87.7                             | 11.2                       |
| 37                      | H        | H   | n = 3, R' = Ph     | H                    | 217.8                              | 459.2 | 106.7 | 101.6                        | 290.4 | 52.3  | 40.0                                | 19.0          | 32.3–49.5                                     | 8.8 to 41.0   | 86.4                             | 0.1                        |
| 38                      | 4-OMe    | H   | n = 2, R' = 4-BrPh | H                    | 18.4                               | 596.6 | 16.8  | 0.2                          | 4.6   | 6.8   | 91.2                                | 42.7          | 40.4–205.9                                    | 22.4 to 81.7  | nd                               |                            |
| 39                      | 4-Br     | H   | n = 2, R' = c-Hex  | H                    | 20.7                               | 396.0 | 22.5  | 1.2                          | 7.0   | 5.5   | 8.4                                 | ~12.5         | 6.7 to 10.4                                   |               | 99.3                             | 6.5                        |
| 40                      | 4-Br     | H   | n = 2, R' = c-Pr   | H                    | 43.9                               | 33.6  | 67.1  | 2.6                          | 20.7  | 10.3  | 2.0                                 | 71.6          | 1.4 to 2.9                                    | 21.8 to 234.8 | 82.6                             | 5.6                        |

<sup>a</sup> IC<sub>50</sub>: compound concentration required to inhibit cell proliferation by 50%. The values represent the means of 3 repeats. Standard deviations (SD) are also provided.

<sup>b</sup> BIC<sub>50</sub>: compound concentration required to prevent biofilm formation (at 25 °C) by 50%, as previously reported [13–16]. 95% confidence intervals are also provided.

<sup>c</sup> nd: not determined. <sup>d</sup> The % survival of the worms in the presence of anti-biofilm compounds was calculated after 7 days relative to their viability at day 0. The values represent the means of least 2 repeats. Standard deviations (SD) are also provided.
